# Supplementary material for: Polytypic ZnCdSe shell layer on a ZnO nanowire array for enhanced solar cell efficiency
Source: Royal Society of Chemistry journal article supplement (doi:10.1039/c1jm15003k), 2011-12-12
Supplement: c1jm15003k.pdf [file c1jm15003k.pdf]

*Supporting Information*

**Polytypic ZnCdSe Shell Layer on ZnO Nanowire Array for Enhanced Solar Cell**

**Efficiency**

Yoon Myung, Jun Ha Kang, Jin Woong Choi, Dong Myung Jang, and Jeunghye Park\*

**Table S1:** Composition and area fraction of two or three resolved XRD peaks, and average mole fraction.

| <i>x</i>   | P1   |                       |                       | P2   |                       |                       | P3   |                       |                       | <i>x<sub>avg</sub></i> <sup>1</sup> |
|------------|------|-----------------------|-----------------------|------|-----------------------|-----------------------|------|-----------------------|-----------------------|-------------------------------------|
|            | 2θ   | <i>x</i> <sub>1</sub> | <i>f</i> <sub>1</sub> | 2θ   | <i>x</i> <sub>2</sub> | <i>f</i> <sub>2</sub> | 2θ   | <i>x</i> <sub>3</sub> | <i>f</i> <sub>3</sub> |                                     |
| <b>0.2</b> | 25.6 | 0.10                  | 0.34                  | 25.8 | 0.22                  | 0.66                  |      |                       |                       | 0.18                                |
| <b>0.3</b> | 25.6 | 0.13                  | 0.30                  | 25.9 | 0.30                  | 0.55                  | 26.4 | 0.56                  | 0.15                  | 0.30                                |
| <b>0.5</b> | 26.0 | 0.35                  | 0.22                  | 26.4 | 0.58                  | 0.50                  | 26.8 | 0.82                  | 0.28                  | 0.60                                |
| <b>0.7</b> | 26.3 | 0.53                  | 0.23                  | 26.6 | 0.73                  | 0.77                  |      |                       |                       | 0.68                                |
| <b>0.8</b> | 26.4 | 0.56                  | 0.23                  | 26.9 | 0.85                  | 0.77                  |      |                       |                       | 0.78                                |

<sup>1</sup>  $x_{avg} = \sum x_i f_i$
